# Supplementary material for: Estimation of aboveground biomass and carbon stocks in different agro-climatic zones of Manipur using GIS and remote sensing
Source: Research Square preprint supplement (doi:10.21203/rs.3.rs-8456615/v1), 2026-02-15
Supplement: Supplementary file 1 [file ac5722a5e8978ad028aebab6.docx]

Supplementary material

**Table**  Vegetation biomass and carbon stock with respect to their NDVI values in different agro-climatic zones of Manipur

| **Sl. No.** | **District** | **Vegetation type** | **Plot_Name** | **NDVI (Jan)** | **AGB (Mg ha-1)** | | | **Total AGB Mg ha-1** | **C-stock Mgha-1** |
| --- | --- | --- | --- | --- | --- | --- | --- | --- | --- |
| **Herbs** | **Shrub** | **Tree** |
| 1 | IMPHAL EAST | Subtropical(community forest) | Andro Plot 1 | 0.41713 | 1.13 | 11.56 | 105.252 | 117.942 | 58.971 |
| 2 | IMPHAL EAST | Subtropical(community forest) | Andro Plot 2 | 0.41832 | 1.63 | 4.23 | 115.275 | 121.135 | 60.5675 |
| 3 | IMPHAL EAST | Subtropical(community forest) | Andro Plot 3 | 0.41032 | 1.24 | 4.22 | 73.58 | 79.04 | 39.52 |
| 4 | IMPHAL EAST | Subtropical(community forest) | Andro Plot 4 | 0.42617 | 1.09 | 2.33 | 117.989 | 121.409 | 60.7045 |
| 5 | IMPHAL WEST | Subtropical(Reserve forest) | Arboretum Plot 1 | 0.24881 | 1.88 | 5.66 | 62.875 | 70.415 | 35.2075 |
| 6 | IMPHAL WEST | Subtropical(Reserve forest) | Arboretum Plot 2 | 0.2897 | 2 | 4.36 | 69.09 | 75.45 | 37.725 |
| 7 | IMPHAL WEST | Subtropical(Reserve forest) | Arboretum Plot 3 | 0.35828 | 1.54 | 4.32 | 77.94 | 83.8 | 41.9 |
| 8 | IMPHAL WEST | Subtropical(Reserve forest) | Arboretum Plot 4 | 0.36964 | 1.47 | 2.36 | 79.09 | 82.92 | 41.46 |
| 9 | CHANDEL | Subtropical(pine forest) | Chandel Plot 1 | 0.52574 | 0.57 | 2.31 | 166.39 | 169.27 | 84.635 |
| 10 | CHANDEL | Subtropical(pine forest) | Chandel Plot 2 | 0.53154 | 0.88 | 2 | 175.6 | 178.48 | 89.24 |
| 11 | CHANDEL | Subtropical(pine forest) | Chandel Plot 3 | 0.46873 | 1.21 | 1.98 | 110.06 | 113.25 | 56.625 |
| 12 | CHANDEL | Subtropical(pine forest) | Chandel Plot 4 | 0.47973 | 1.34 | 2.56 | 129.39 | 133.29 | 66.645 |
| 13 | TAMENLONG | Temperate forest | Tupul Plot 1 | 0.57561 | 2.41 | 3.1 | 189 | 194.51 | 97.255 |
| 14 | TAMENGLONG | Temperate forest | Tupul Plot 2 | 0.59058 | 2.92 | 3 | 192.13 | 198.05 | 99.025 |
| 15 | TAMENGLONG | Temperate forest | Tupul Plot 3 | 0.58119 | 1.39 | 9.86 | 196.89 | 208.14 | 104.07 |
| 16 | TAMENGLONG | Temperate forest | Tupul Plot 4 | 0.53933 | 2.92 | 4.2 | 188 | 195.12 | 97.56 |
| 17 | CCPUR | Subtropical(plantation forest) | Hengkot Plantation Plot 4 | 0.61881 | 0.98 | 2.5 | 127.08 | 130.56 | 65.28 |
| 18 | BISHNUPUR | Subtropical(community forest) | Koriphaba Plot 1 | 0.31617 | 1.54 | 8.5 | 34.23 | 44.27 | 22.135 |
| 19 | BISHNUPUR | Subtropical(community forest) | Koriphaba Plot 3 | 0.35616 | 0.98 | 3.11 | 58.28 | 62.37 | 31.185 |
| 20 | UKHRUL | Subtropical(Natural forest) | Lungphu Plot 1 | 0.61714 | 1 | 2.33 | 132.56 | 135.89 | 67.945 |
| 21 | UKHRUL | Subtropical(Natural forest) | Lungphu Plot 4 | 0.54743 | 1.23 | 2.14 | 116.23 | 119.6 | 59.8 |
| 22 | UKHRUL | Subtropical(Natural forest) | Lungphu Plot 2 | 0.62188 | 2.47 | 2 | 143.94 | 148.41 | 74.205 |
| 23 | UKHRUL | Subtropical(Natural forest) | Lungphu Plot 3 | 0.56431 | 2.56 | 3.21 | 121.83 | 127.6 | 63.8 |
| 24 | UKHRUL | Subtropical(pine forest) | Ukhrul Plot 1 | 0.57451 | 0.82 | 2.42 | 172 | 175.24 | 87.62 |
| 25 | UKHRUL | Subtropical(pine forest) | Ukhrul Plot 2 | 0.56207 | 0.24 | 4.56 | 175 | 179.8 | 89.9 |
| 26 | UKHRUL | Subtropical(pine forest) | Ukhrul Plot 3 | 0.58341 | 1.23 | 3.44 | 157.03 | 161.7 | 80.85 |
| 27 | UKHRUL | Subtropical(pine forest) | Ukhrul Plot 4 | 0.5497 | 1 | 2.57 | 113.21 | 116.78 | 58.39 |
| 28 | SENAPATI | Subtropical(pine forest) | Senapati Plot 1 | 0.33469 | 2.11 | 5 | 67 | 74.11 | 37.055 |
| 29 | SENAPATI | Subtropical(Natural forest) | Senapati plot2 | 0.27831 | 2.45 | 4.56 | 54 | 61.01 | 30.505 |
| 30 | IMPHAL WEST | Subtropical Pine Forest | Eroisemba | 0.27158 | 0.65 | 5.66 | 80.71 | 87.02 | 43.51 |
| 31 | CHANDEL | Tropical (Dipterocarpus forest) | Moreh Plot 2 | 0.38042 | 1 | 3.6 | 91.27 | 95.87 | 47.93 |
| 32 | CHANDEL | Tropical (natural forest) | Moreh Plot 1 | 0.43838 | 1.05 | 3.65 | 198.4 | 203.1 | 101.55 |
